# Supplementary material for: Multi-drug resistance and extended spectrum beta lactamase producing Gram negative bacteria from chicken meat in Bharatpur Metropolitan, Nepal
Source: PubMed Central journal article supplement (PMC5678746; doi:10.1186/s13104-017-2917-x), 2017-11-07
Supplement: 13104_2017_2917_MOESM1_ESM.pdf [file 13104_2017_2917_MOESM1_ESM.pdf]

## **Additional file 1**

### **BMC Research Notes**

#### **Multi-drug resistance and extended spectrum beta lactamase producing Gram negative bacteria from chicken meat in Bharatpur Metropolitan, Nepal**

*Anil Shrestha<sup>1</sup>, Anup Muni Bajracharya<sup>1</sup>, Hemraj Subedi<sup>1</sup>, Raju Shah Turha<sup>1</sup>, Sachin Kafle<sup>1</sup>, Saroj Sharma<sup>1</sup>, Sunil Neupane<sup>1</sup> and Dhiraj Kumar Chaudhary<sup>2\*</sup>*

<sup>1</sup>Department of Microbiology, Balkumari College, Chitwan, Nepal

<sup>2</sup>Department of Microbiology, Prithu Technical College, Institute of Agriculture and Animal Science, Tribhuvan University, Dang, Nepal

**Contents category:** Research note

**\*Corresponding author:** Dhiraj Kumar Chaudhary

Tel: +977-9841441236

E-mail: [dhirajchaudhary2042@gmail.com](mailto:dhirajchaudhary2042@gmail.com)

**Additional Table S1: Questionnaire during sample collection. R, regular; Ir, irregular; C, covered; UC, uncovered; F, flies observed.**

| Sample | Washing of slaughter house |    | Washing of apron |    | Use of Handsanitizer | Washing chopping board |   |   | Showcased condition meat |     | Sanitation type |
|--------|----------------------------|----|------------------|----|----------------------|------------------------|---|---|--------------------------|-----|-----------------|
|        | R                          | Ir | R                | Ir |                      | R                      | I | C | UC                       | F   |                 |
| B-1    | √                          |    | √                |    | No                   | √                      |   | √ |                          | No  | Good            |
| B-2    | √                          |    | √                |    | Yes                  | √                      |   | √ |                          | No  | Good            |
| B-3    |                            | √  |                  | √  | No                   |                        | √ |   | √                        | Yes | Poor            |
| B-4    |                            | √  |                  | √  | No                   |                        | √ |   | √                        | Yes | Poor            |
| B-5    | √                          |    |                  | √  | No                   | √                      |   | √ |                          | No  | Good            |
| B-6    |                            | √  |                  | √  | No                   |                        | √ |   | √                        | Yes | Poor            |
| B-7    | √                          |    |                  | √  | Yes                  | √                      |   | √ |                          | No  | Good            |
| B-8    |                            | √  |                  | √  | No                   |                        | √ |   | √                        | Yes | Poor            |
| B-9    |                            | √  |                  | √  | No                   |                        | √ |   | √                        | Yes | Poor            |
| B-10   |                            | √  | √                |    | No                   | √                      |   | √ |                          | No  | Good            |
| B-11   |                            | √  |                  | √  | No                   | √                      |   |   | √                        | Yes | Poor            |
| B-12   | √                          |    |                  | √  | No                   | √                      |   | √ |                          | No  | Good            |
| B-13   |                            | √  |                  | √  | No                   |                        | √ |   | √                        | Yes | Poor            |
| B-14   |                            | √  |                  | √  | No                   |                        | √ |   | √                        | Yes | Poor            |
| B-15   |                            | √  |                  | √  | No                   |                        | √ |   | √                        | Yes | Poor            |
| B-16   |                            | √  |                  | √  | No                   | √                      |   |   | √                        | Yes | Poor            |
| B-17   |                            | √  |                  | √  | No                   |                        | √ |   | √                        | Yes | Poor            |
| B-18   |                            | √  | √                |    | No                   | √                      |   | √ |                          | No  | Good            |
| B-19   |                            | √  |                  | √  | No                   |                        | √ |   | √                        | Yes | Poor            |
| B-20   |                            | √  |                  | √  | No                   |                        | √ |   | √                        | Yes | Poor            |
| B-21   | √                          |    |                  | √  | No                   | √                      |   | √ |                          | No  | Good            |
| B-22   |                            | √  |                  | √  | No                   | √                      |   |   | √                        | Yes | Poor            |
| B-23   | √                          |    |                  | √  | Yes                  | √                      |   | √ |                          | No  | Good            |

|      |   |   |     |   |   |     |      |
|------|---|---|-----|---|---|-----|------|
| B-24 | √ | √ | No  | √ | √ | Yes | Poor |
| B-25 | √ | √ | No  | √ | √ | Yes | Poor |
| B-26 | √ | √ | No  | √ | √ | Yes | Poor |
| B-27 | √ | √ | No  | √ | √ | No  | Good |
| B-28 | √ | √ | No  | √ | √ | Yes | Poor |
| B-29 | √ | √ | No  | √ | √ | No  | Good |
| B-30 | √ | √ | No  | √ | √ | Yes | Poor |
| B-31 | √ | √ | No  | √ | √ | Yes | Poor |
| B-32 | √ | √ | No  | √ | √ | Yes | Poor |
| B-33 | √ | √ | No  | √ | √ | Yes | Poor |
| B-34 | √ | √ | No  | √ | √ | No  | Good |
| B-35 | √ | √ |     | √ | √ |     | Poor |
| B-36 | √ | √ | Yes | √ | √ | No  | Good |
| B-27 | √ | √ | No  | √ | √ | No  | Good |
| B-38 | √ | √ |     | √ | √ |     | Poor |

**Additional Table S2: Number of bacterial isolates in different chicken meat samples.**

| Sample type     | No. of bacterial isolates per sample | No. of sample | Total no. of bacterial isolates |
|-----------------|--------------------------------------|---------------|---------------------------------|
| Good Sanitation | 1                                    | 1             | 1                               |
|                 | 2                                    | 13            | 26                              |
| Poor sanitation | 3                                    | 20            | 60                              |
|                 | 4                                    | 4             | 16                              |
| Total           |                                      | 38            | 103                             |

**Additional Table S3: Antibiotic resistivity pattern of major isolated bacteria.**

| Antibiotic Group | Antibiotic Used           | <i>Citrobacter</i> species (%) | <i>Salmonella</i> species (%) | <i>Proteus</i> species (%) |
|------------------|---------------------------|--------------------------------|-------------------------------|----------------------------|
| Cephalosporin    | Cefotaxime                | 19.5                           | 5.9                           | 5.8                        |
|                  | Ceftazidime               | 18.7                           | 12.5                          | 0                          |
| Aminoglycoside   | Gentamicin                | 5.1                            | 2.5                           | 0                          |
| Carbapenems      | Imipenem                  | 32.6                           | 33.3                          | 29.4                       |
| Fluoroquinolones | Ciprofloxacin             | 19.5                           | 46.1                          | 11.7                       |
| Tetracycline     | Doxycycline Hydrochloride | 2.5                            | 84.0                          | 5.8                        |
| Nitrofurans      | Nitofurantoin             | 15.2                           | 84.6                          | 11.1                       |
| Polymyxin        | Polymyxin B               | 0                              | 31.8                          | 0                          |
|                  | Colistin                  | 0                              | 26.9                          | 0                          |
| Penicillin       | Ampicillin                | 0                              | 100.0                         | 0                          |

**Additional Table S4: Pattern of MDR isolates in different chicken meat samples.**

| Sample Type     | MDR isolates | Non-MDR isolates | Total isolates | Chi-square (P-value) |
|-----------------|--------------|------------------|----------------|----------------------|
| Good Sanitation | 19           | 8                | 27             | 1.92 (0.16)          |
| Poor Sanitation | 63           | 13               | 76             |                      |
| Total           | 82           | 21               | 103            |                      |

**Additional Table S5: Pattern of ESBL producer isolates in different chicken meat samples.**

| Sample Type     | ESBL producer | Non-ESBL producer | Total isolates | Chi-square (P-value) |
|-----------------|---------------|-------------------|----------------|----------------------|
| Good Sanitation | 10            | 17                | 27             | 0.04 (0.82)          |
| Poor Sanitation | 30            | 46                | 76             |                      |
| Total           | 40            | 63                | 103            |                      |

**Additional Figure A1: Isolation of *E. coli* from chicken meat (Sample no. B-32)**

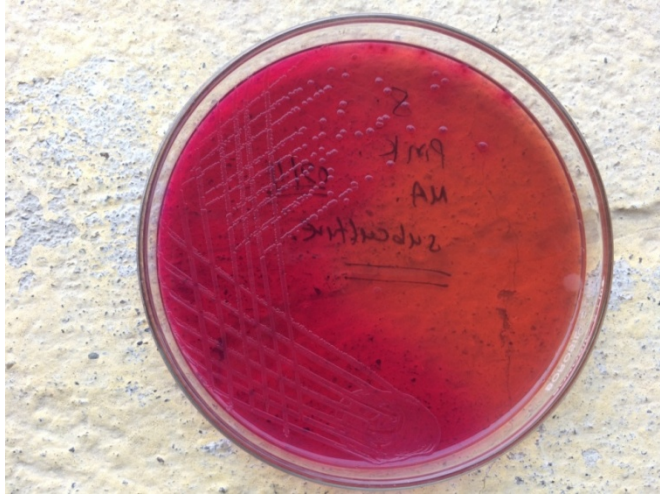

**Fig. A1**

**Additional Figure A2: Antibiotic susceptibility test of *E. coli* (Sample no. B-32)**

(Resistant: Doxycycline Hydrochloride, Ceftazidime; Sensitive: Gentamicin, Ciprofloxacin, Nalidixic acid)

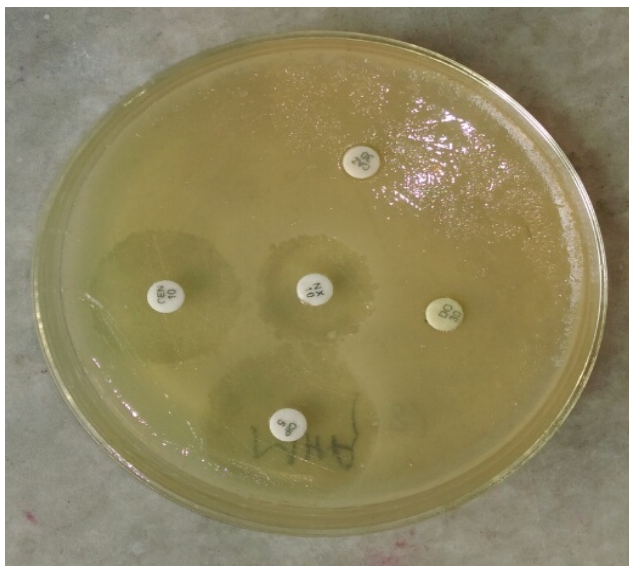

**Fig. A2**

**Additional Figure A3: Detection of ESBL producing *Citrobacter* spp. by Combination disk method (Sample no: B-18)**

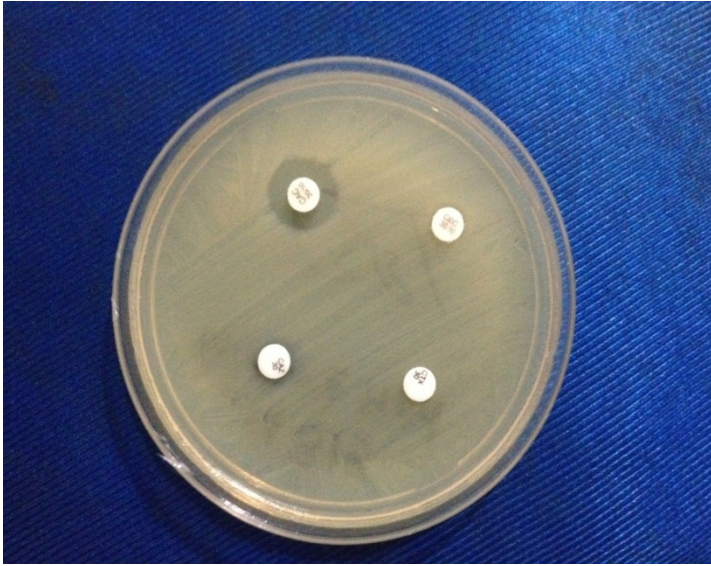

**Fig. A3**
